# Supplementary material for: The Cyclobutanocucurbit[5–8]uril Family: Electronegative Cavities in Contrast to Classical Cucurbituril while the Electropositive Outer Surface Acts as a Crystal Packing Driver
Source: MDPI journal article supplement (doi:10.3390/molecules26237343), 2021-12-03
Supplement: s1 [file s1]

# The Cyclobutanocucurbit[5–8]uril Family: Electronegative Cavities in Contrast to Classical Cucurbituril while the Electropositive Outer Surface Acts as a Crystal Packing Driver

Minghua Chen,<sup>1</sup> Naixia Lv,<sup>1</sup> Weiwei Zhao<sup>2</sup> and Anthony I. Day<sup>3,\*</sup>

## Table of Contents:

|                                                                                                                                                                                              | Page |
|----------------------------------------------------------------------------------------------------------------------------------------------------------------------------------------------|------|
| Figure S1 and S2 Crystal packing of CyB <sub>5</sub> Q[5] · 7H <sub>2</sub> O (1) including and excluding structural water                                                                   | S2   |
| Figure S3 Crystal packing of Crystal packing of CyB <sub>6</sub> Q[6] · 2Cl <sup>-</sup> · 2(H <sub>3</sub> O <sup>+</sup> ) · 14H <sub>2</sub> O (2) including structural water             | S3   |
| Figure S4 and S5 Crystal packing of CyB <sub>7</sub> Q[7] · 12H <sub>2</sub> O (3) including structural water                                                                                | S4   |
| Figure S6 Crystal packing of CyB <sub>8</sub> Q[8] · (ZnCl <sub>3</sub> · H <sub>2</sub> O) <sup>-</sup> · H <sub>3</sub> O <sup>+</sup> · 10H <sub>2</sub> O (4) including structural water | S5   |
| Table S1 The water H-bond parameters of complexes 1-4                                                                                                                                        | S6-7 |

## 1.1 Crystal packing of CyB<sub>5</sub>Q[5] • 7H<sub>2</sub>O (1)

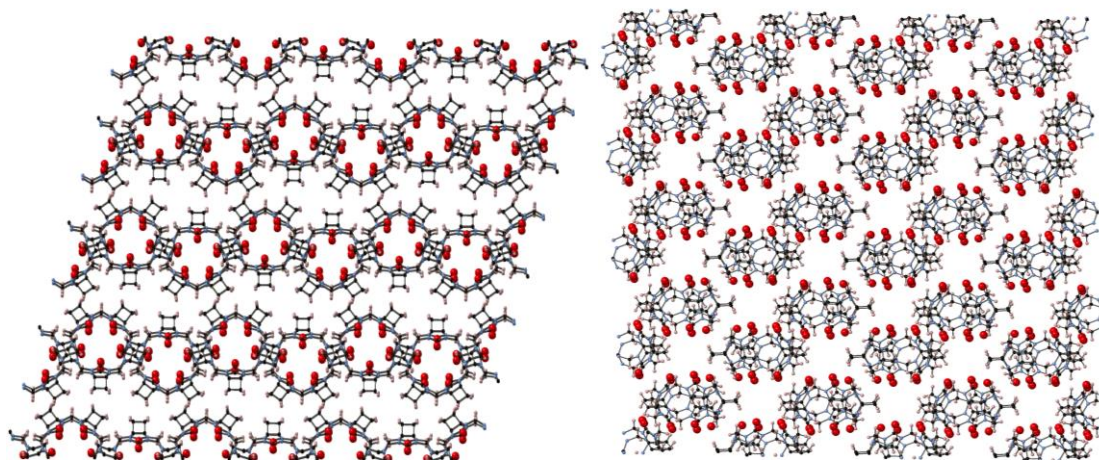

Figure S1. LHS CyB<sub>5</sub>Q[5] crystal packing viewed through the portals showing the formation of corrugated sheets. The free H<sub>2</sub>O has been omitted which lies between the sheets. RHS is the side view of the CyB<sub>5</sub>Q[5] aligned in columns but out of register with their neighbouring column (x-y face) H<sub>2</sub>O omitted.

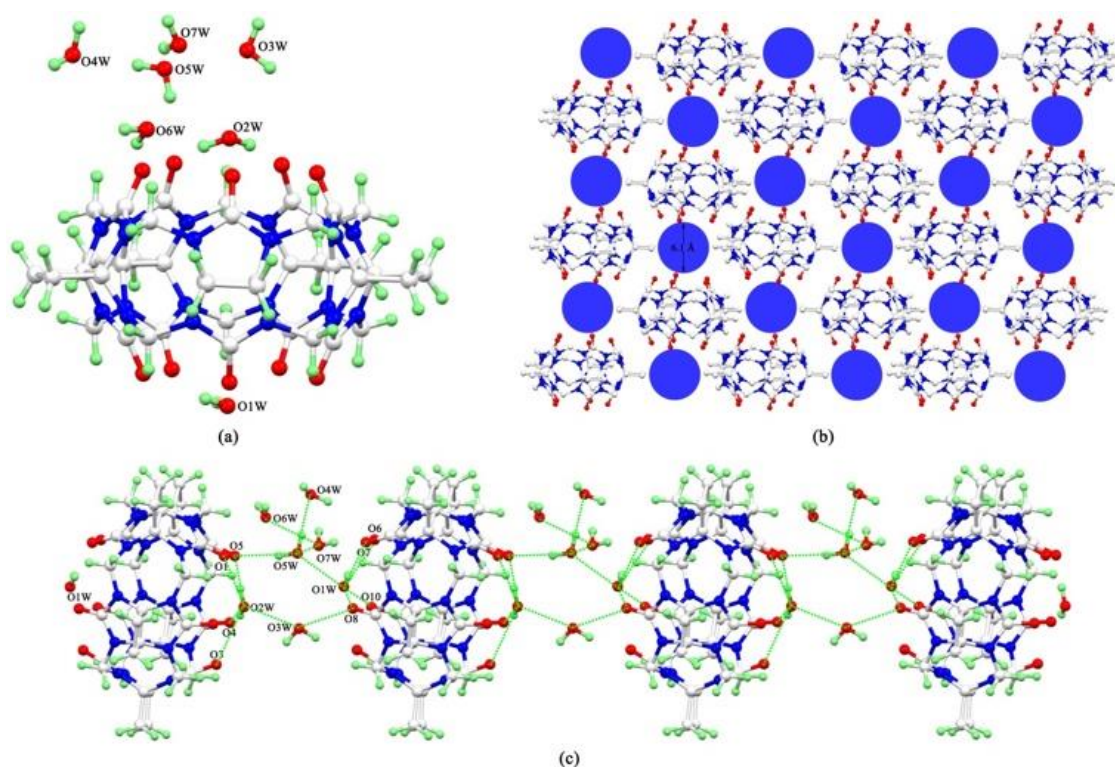

Figure S2. Crystal structure of CyB<sub>5</sub>Q[5] • 7H<sub>2</sub>O : (a) Asymmetric unit, (b) 3-D stacking with water channels blue discs (~6.1 Å), (c) H-bonding interactions with free H<sub>2</sub>O and 1-D supramolecular chain of (CyB<sub>5</sub>Q[5] • 7H<sub>2</sub>O)*n*.

## 1.2 Crystal packing of $\text{CyB}_6\text{Q}[6] \cdot 2\text{Cl}^- \cdot 2(\text{H}_3\text{O}^+) \cdot 14\text{H}_2\text{O}$ (2)

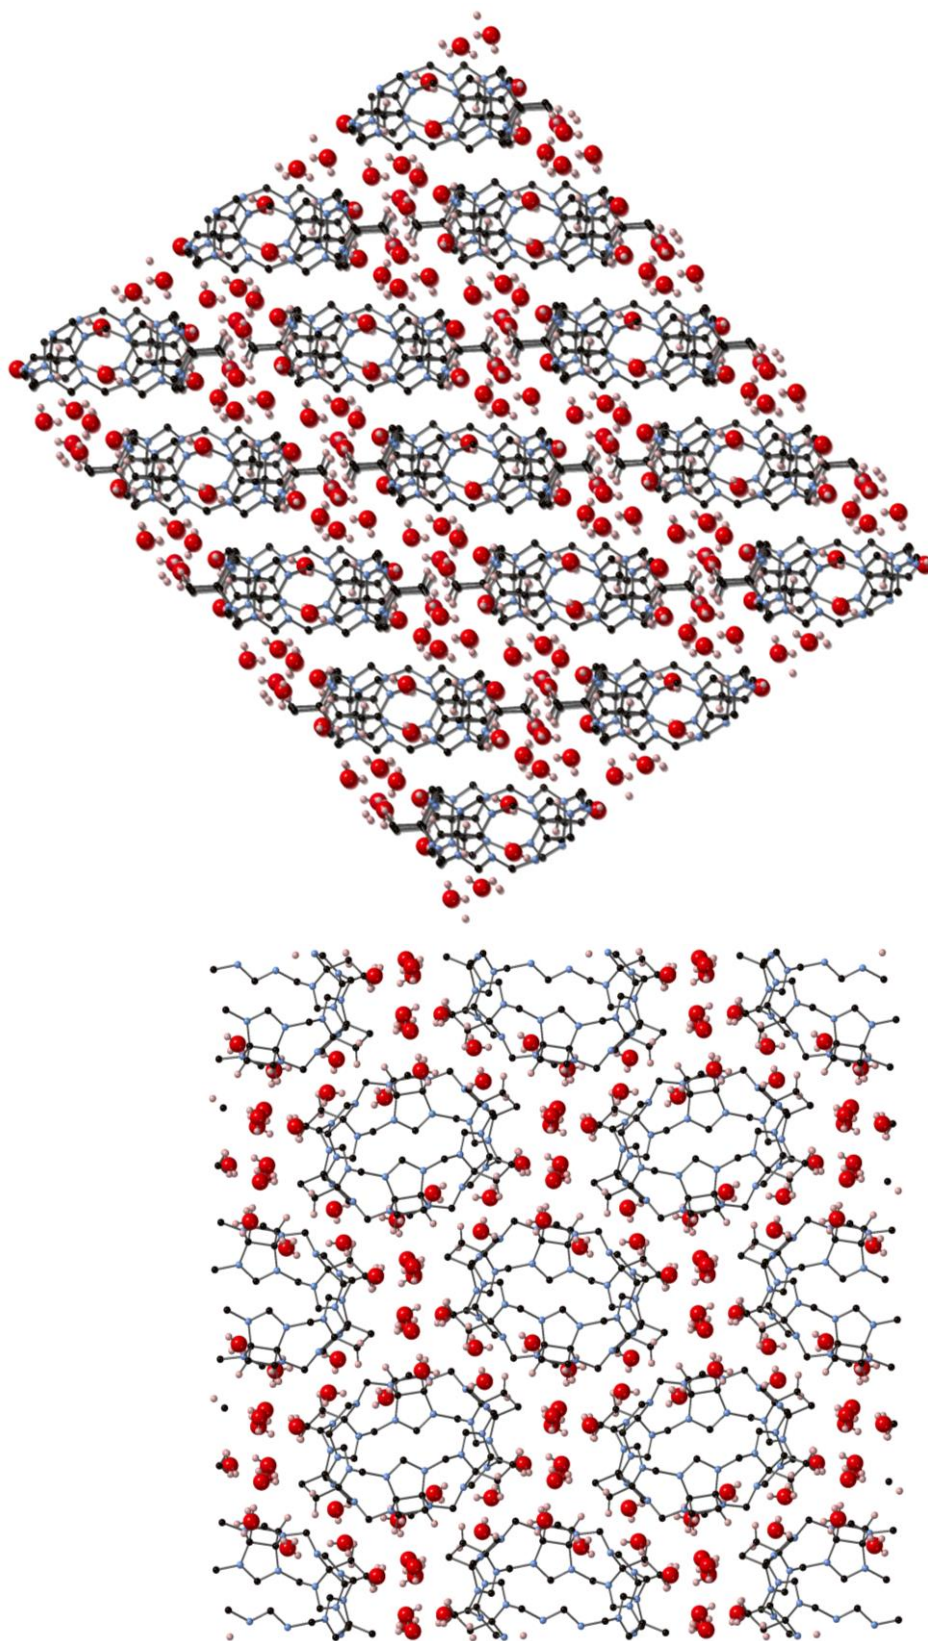

y-z face

Figure S3. All free water has been included and all carbonyl O and chloride atoms have been omitted for clarity. (Top) x-z face gives a side view of the  $\text{CyB}_6\text{Q}[6]$  cages free water location. (Bottom) y-z face a slightly tilted portal view showing free water locations.



### 1.3 Crystal packing of CyB<sub>7</sub>Q[7]·12H<sub>2</sub>O (3)

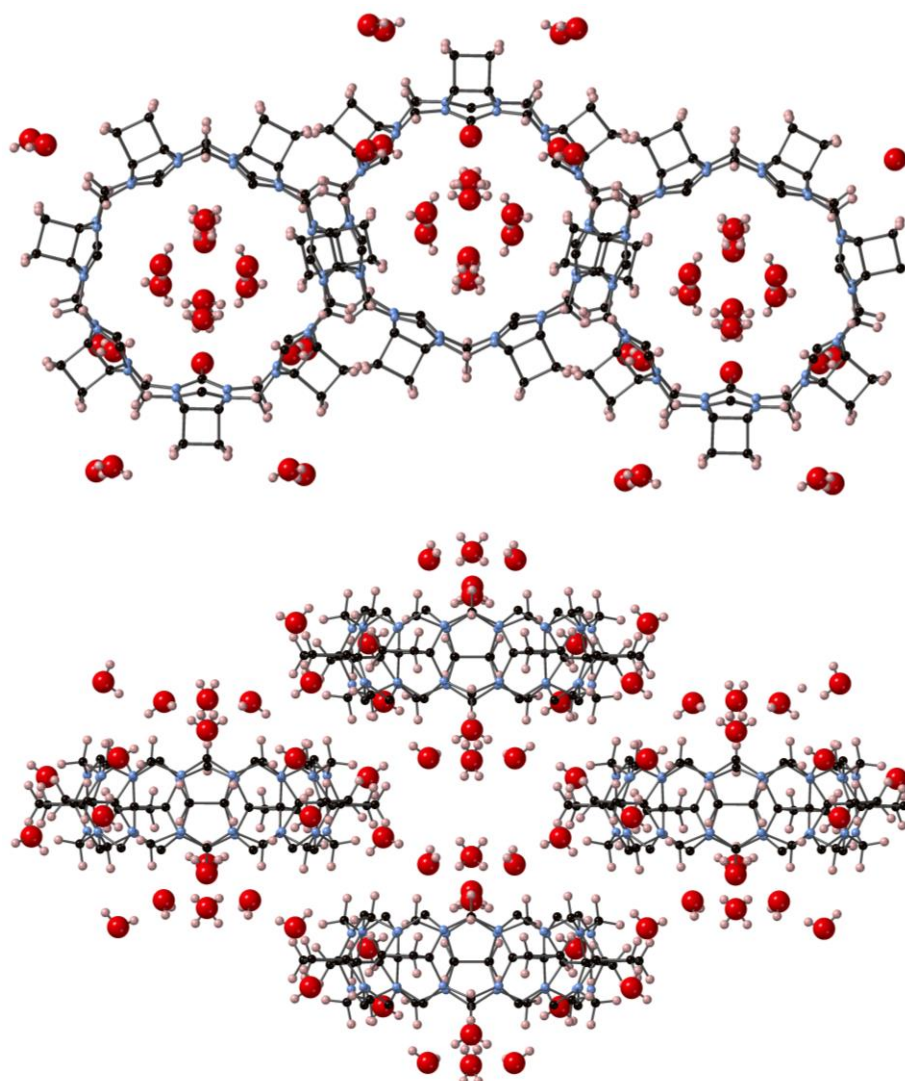

Figure S4. All free water has been included and all carbonyl O atoms have been omitted for clarity. (Top) Portal view

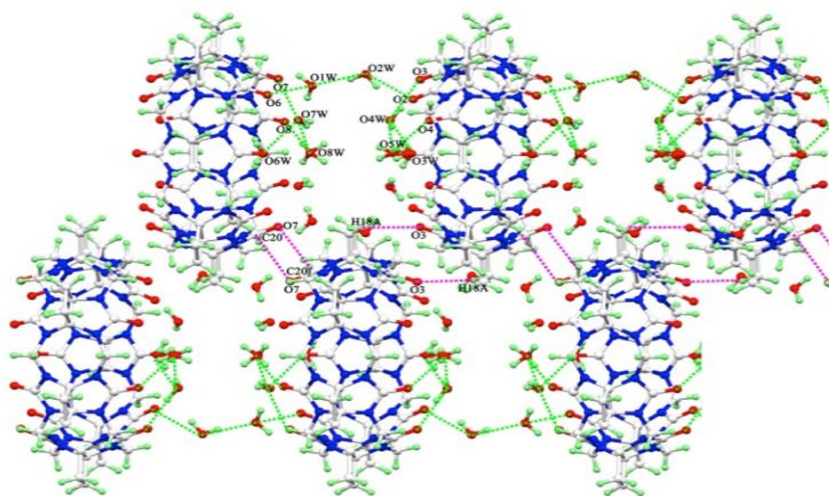

Figure S5. Showing the H-bonding network

**1.4 CyB8Q[8]·(ZnCl<sub>3</sub>·H<sub>2</sub>O)·H<sub>3</sub>O<sup>+</sup>·10H<sub>2</sub>O (4)**

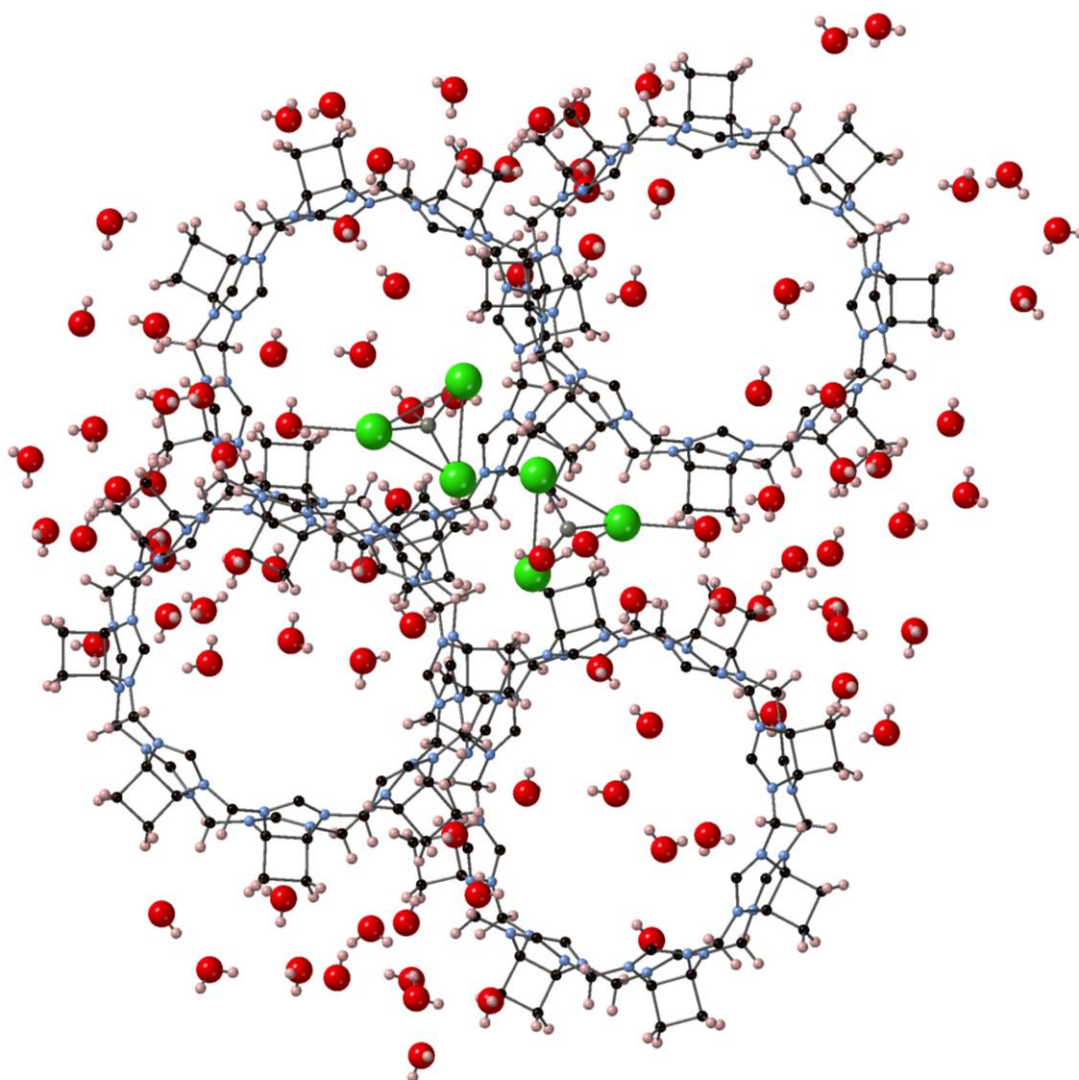

Figure S6. All free water has been included and all carbonyl O atoms have been omitted for clarity.

Table S1. The water H-bond parameters of complexes 1-4.

| complexes | bond           | bond length/Å |       |       | bond angle/° |
|-----------|----------------|---------------|-------|-------|--------------|
|           | X—H...Y        | X—H           | H...Y | X...Y | X—H...Y      |
| 1         | O2W—H2WA...O1  | 0.850         | 2.246 | 2.874 | 130.68       |
|           | O2W—H2WB...O3  | 0.850         | 2.546 | 2.898 | 106.01       |
|           | O2W—H2WB...O4  | 0.850         | 2.061 | 2.885 | 163.07       |
|           | O2W—H2WA...O5  | 0.850         | 2.211 | 2.888 | 136.47       |
|           | O1W—H1WA...O6  | 0.850         | 2.140 | 2.900 | 148.67       |
|           | O1W—H1WB...O7  | 0.849         | 2.049 | 2.848 | 156.69       |
|           | O1W—H1WB...O8  | 0.849         | 2.540 | 2.975 | 112.92       |
|           | O1W—H1WA...O10 | 0.850         | 2.459 | 2.809 | 105.56       |
|           | O3W—H3WA...O2W | 0.849         | 2.578 | 2.804 | 96.50        |
|           | O3W—H3WB...O8  | 0.850         | 2.533 | 2.956 | 111.79       |
|           | O5W—H3WA...O4W | 0.850         | 1.967 | 2.778 | 158.94       |
|           | O5W—H3WB...O5  | 0.850         | 1.992 | 2.837 | 172.91       |
|           | O7W—H7WA...O6  | 0.849         | 2.481 | 2.733 | 98.05        |
| 2         | O1W—H1WA...O4  | 0.850         | 2.352 | 2.984 | 131.51       |
|           | O1W—H1WB...O5W | 0.851         | 1.933 | 2.758 | 163.13       |
|           | O6W—H6WB...O1  | 0.850         | 2.492 | 2.802 | 102.47       |
|           | O2W—H2WA...O5  | 0.850         | 2.149 | 2.896 | 146.62       |
|           | O3W—H3WA...O2W | 0.849         | 2.006 | 2.651 | 132.11       |
|           | O4W—H4WA...O3W | 0.851         | 2.145 | 2.816 | 135.52       |
|           | O6W—H6WA...O4W | 0.850         | 2.137 | 2.736 | 127.13       |
|           | O7W—H7WB...O3  | 0.849         | 2.117 | 2.807 | 138.16       |
|           | O8W—H8WB...O1  | 0.849         | 2.125 | 2.784 | 134.12       |
|           | O4W—H4WB...Cl1 | 0.849         | 2.403 | 2.903 | 118.18       |
|           | O3W—H3WB...Cl1 | 0.851         | 2.784 | 2.960 | 93.44        |
|           | O5W—H5WB...Cl1 | 0.850         | 2.460 | 3.223 | 149.62       |
| 3         | O2W—H2WB...O2  | 0.849         | 1.979 | 2.739 | 148.39       |
|           | O2W—H2WA...O3  | 0.851         | 1.879 | 2.689 | 158.68       |
|           | O1W—H1WA...O6  | 0.851         | 2.342 | 2.844 | 118.15       |
|           | O7W—H7WA...O8W | 0.850         | 1.989 | 2.743 | 147.37       |
|           | O4W—H4WA...O3W | 0.848         | 2.057 | 2.775 | 142.10       |
|           | O8W—H8WA...O8  | 0.850         | 2.047 | 2.897 | 178.05       |

|   |                  |       |       |       |        |
|---|------------------|-------|-------|-------|--------|
| 4 | O5W—H5WB...O4    | 0.846 | 2.287 | 3.017 | 144.57 |
|   | O1W—H1WA...O2W   | 0.851 | 2.363 | 3.029 | 135.43 |
|   | O3W—H3WC...O2W   | 0.848 | 2.175 | 3.004 | 165.85 |
|   | O3W—H3WB...O4W   | 0.850 | 1.946 | 2.780 | 166.87 |
|   | O4W—H4WB...O5W   | 0.849 | 2.363 | 2.878 | 119.59 |
|   | O5W—H5WA...O1    | 0.850 | 2.138 | 2.958 | 162.22 |
|   | O5W—H5WB...O3    | 0.849 | 2.710 | 2.863 | 91.64  |
|   | O6W—H6WB...O7W   | 0.850 | 1.972 | 2.794 | 152.06 |
|   | O6W—H6WA...O4W   | 0.850 | 1.960 | 2.741 | 162.17 |
|   | O7W—H7WB...O9    | 0.849 | 2.099 | 2.834 | 144.67 |
|   | O8W—H8WB...O13   | 0.851 | 2.109 | 2.883 | 150.99 |
|   | O9W—H9WA...O4    | 0.849 | 2.468 | 3.121 | 134.34 |
|   | O10W—H10WB...O9W | 0.851 | 2.075 | 2.750 | 135.79 |
|   | O11W—H11A...O7   | 0.849 | 2.087 | 2.868 | 152.63 |
|   | O12W—H11C...O11W | 0.870 | 1.800 | 2.612 | 154.56 |
|   | O12W—H11D...O10W | 0.871 | 1.786 | 2.650 | 171.05 |
